# Supplementary material for: Reliability of beat-to-beat blood pressure variability in older adults
Source: Research Square preprint supplement (doi:10.21203/rs.3.rs-4190135/v1), 2024-04-19
Supplement: Supplementary file 1 [file ebd59ea5f660f8456ba3e181.docx]

**Supplemental Table 1: BPV metrics correlations with average systolic or diastolic blood pressures with and without age and sex adjustment**

| BPV Metric | Pearson’s r | *P* | Age and sex adj. *B* | *P* |
| --- | --- | --- | --- | --- |
| SBP SD (mmHg) | .10 | .32 | .93 | .27 |
| SBP CV | -.11 | .29 | -.95 | .39 |
| SBP VIM | -.11 | .23 | -5.07 | .36 |
| SBP ARV | .20 | .04 | 2.43 | .22 |
| ΔSBP | .30 | .001 | .48 | .002 |
| DBP SD (mmHg) | -.22 | .02 | -.91 | .05 |
| DBP CV | .06 | .55 | -.19 | .75 |
| DBP VIM | -.008 | .93 | 1.49 | .19 |
| DBP ARV | -.25 | .009 | -1.57 | .03 |

**Dependent variables: average systolic blood pressure and average diastolic blood pressure.** BPV: blood pressure variability, adj: adjusted, *B*= unstandardized regression coefficient, *P*= p-value, SBP: systolic blood pressure, SD: standard deviation, CV: coefficient of variation, VIM: variability independent of the mean, ARV: average real variability, DBP: diastolic blood pressure. N= 111

**Supplemental Table 2: BPV metrics correlations with age**

| BPV Metric | Pearson’s r | *P* |
| --- | --- | --- |
| SBP SD (mmHg) | -.003 | .97 |
| SBP CV | -.08 | .42 |
| SBP VIM | -.09 | .36 |
| SBP ARV | .34 | .0003 |
| ΔSBP | .09 | .34 |
| DBP SD (mmHg) | .28 | .003 |
| DBP CV | .28 | .003 |
| DBP VIM | -.32 | .0006 |
| DBP ARV | .32 | .0005 |

**Dependent variable: age (years).** BPV: blood pressure variability, SBP: systolic blood pressure, SD: standard deviation, CV: coefficient of variation, VIM: variability independent of the mean, ARV: average real variability, DBP: diastolic blood pressure. N= 111
